# Supplementary material
Source: publisher figshare collection journal article supplement (https://wiley.figshare.com/articles/dataset/_/3555714)
Supplement: Supplementary file 1 [file 1]

Beyond shading: litter production by neighbors  
contributes to overyielding in tropical trees

*Appendix A*

Jurgis Sapijanskas, Catherine Potvin and Michel Loreau

# Appendix A: Figure showing the planting design and Anova table for the temporal change in the magnitude of overyielding

Six-species planting design

|     |     |     |     |     |     |     |     |
|-----|-----|-----|-----|-----|-----|-----|-----|
| Tr  | Co  | Ca  | Ls  | Ae  | Hc  | Tr  | ... |
| Co  | Ca  | Ls  | Ae  | Hc  | Tr  | Co  | ... |
| Ca  | Ls  | Ae  | Hc  | Tr  | Co  | Ca  | ... |
| LS  | Ae  | Hc  | Tr  | Co  | Ca  | Ls  | ... |
| Ae  | Hc  | Tr  | Co  | Ca  | Ls  | Ae  | ... |
| Hc  | Tr  | Co  | Ca  | Ls  | Ae  | Hc  | ... |
| Tr  | Co  | Ca  | Ls  | Ae  | Hc  | Tr  | ... |
| ... | ... | ... | ... | ... | ... | ... | ... |

Three-species planting design

|     |     |     |     |     |
|-----|-----|-----|-----|-----|
| Hc  | Ca  | Co  | Hc  | ... |
| Ca  | Co  | Hc  | Ca  | ... |
| Co  | Hc  | Ca  | Co  | ... |
| ... | ... | ... | ... | ... |

|     |     |     |     |     |
|-----|-----|-----|-----|-----|
| Tr  | Ae  | Ls  | Tr  | ... |
| Ae  | Ls  | Tr  | Ae  | ... |
| Ls  | Tr  | Ae  | Ls  | ... |
| ... | ... | ... | ... | ... |

|     |     |     |     |     |
|-----|-----|-----|-----|-----|
| Ls  | Ae  | Co  | Ls  | ... |
| Ae  | Co  | Ls  | Ae  | ... |
| Co  | Ls  | Ae  | Co  | ... |
| ... | ... | ... | ... | ... |

  

|     |     |     |     |     |
|-----|-----|-----|-----|-----|
| Ls  | Hc  | Co  | Ls  | ... |
| Hc  | Co  | Ls  | Hc  | ... |
| Co  | Ls  | Hc  | Co  | ... |
| ... | ... | ... | ... | ... |

|     |     |     |     |     |
|-----|-----|-----|-----|-----|
| Tr  | Ca  | Hc  | Tr  | ... |
| Ca  | Hc  | Tr  | Ca  | ... |
| Hc  | Tr  | Ca  | Hc  | ... |
| ... | ... | ... | ... | ... |

|     |     |     |     |     |
|-----|-----|-----|-----|-----|
| Tr  | Ae  | Ca  | Tr  | ... |
| Ae  | Ca  | Tr  | Ae  | ... |
| Ca  | Tr  | Ae  | Ca  | ... |
| ... | ... | ... | ... | ... |

Figure A1: Planting design in mixture plots. The composition of the six 3-species plots was defined by randomly choosing between Ca and Ls, Ae and Hc, and Co and Tr. These three groups of species cover the range of relative growth rates in diameter at breast height in the nearby forest of Barro Colorado Island from 2.3% (Co) to 9.1% (Ls) per year. Consequently, while species composition differed among the six 3-species plots, faster and slower growing species were equally represented in any given plot.

Table A1: Anova table for the effects of time, diversity treatment and their interaction on the magnitude of overyielding (SES) in polycultures between years 5 and 10 after planting.

|                               | Df | Sum Sq | Mean Sq | F value | Pr(>F) |
|-------------------------------|----|--------|---------|---------|--------|
| Time                          | 1  | 67.53  | 67.53   | 11.54   | 0.0094 |
| Diversity level               | 1  | 47.67  | 47.67   | 8.15    | 0.0213 |
| Time $\times$ Diversity level | 1  | 3.62   | 3.62    | 0.62    | 0.4544 |
| Residuals                     | 8  | 46.81  | 5.85    |         |        |
