# Supplementary material
Source: publisher figshare collection journal article supplement (https://wiley.figshare.com/articles/dataset/_/3555714)
Supplement: Supplementary file 2 [file 1 › appendix-A.htm]

Ecological Archives E094-080-A1


*Ecological Archives* E094-080-A1

Jurgis Sapijanskas, Catherine Potvin, Michel Loreau. 2013. Beyond shading: Litter production by neighbors contributes to overyielding in tropical trees. *Ecology* 94:941–952. http://dx.doi.org/10.1890/12-0337.1

Appendix A. Figure showing the planting design and ANOVA table for the temporal change in the magnitude of overyielding.

> View / download PDF.


---

[Back to E094-080]
